# Supplementary material for: A balance of positive and negative regulators determines the pace of the segmentation clock
Source: eLife journal article supplement (doi:10.7554/elife.05842), 2015-09-10
Supplement: supp [file elife-05842-supp-v1.zip]

Archive with 7 entries (7 files):
- elife_poa_e05842_Figure_8_figure_supplement_1.pdf
- elife_poa_e05842_Figure_6_figure_supplement_1.pdf
- elife_poa_e05842_Supplementary_File_1.pdf
- elife_poa_e05842_Figure_4_figure_supplement_1.pdf
- elife_poa_e05842_Figure_2_figure_supplement_3.pdf
- elife_poa_e05842_Figure_2_figure_supplement_2.pdf
- elife_poa_e05842_Figure_2_figure_supplement_1.pdf
