# Supplementary material for: A balance of positive and negative regulators determines the pace of the segmentation clock
Source: eLife journal article supplement (doi:10.7554/elife.05842), 2015-09-10

Figure 2 Figure supplement 2)

Mean number of pH3 positive cells per PSM area (cell per mm<sup>2</sup>)

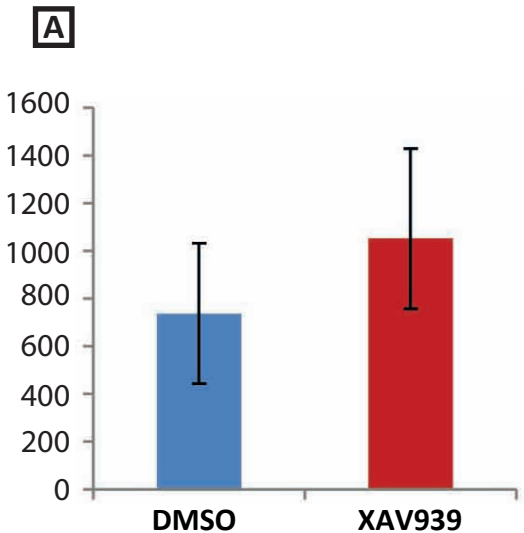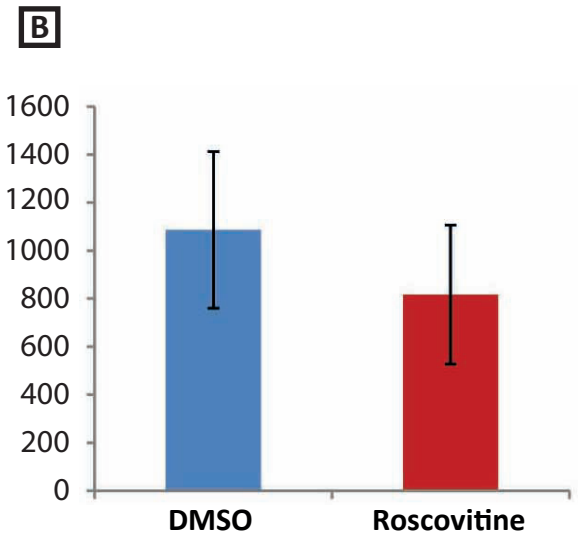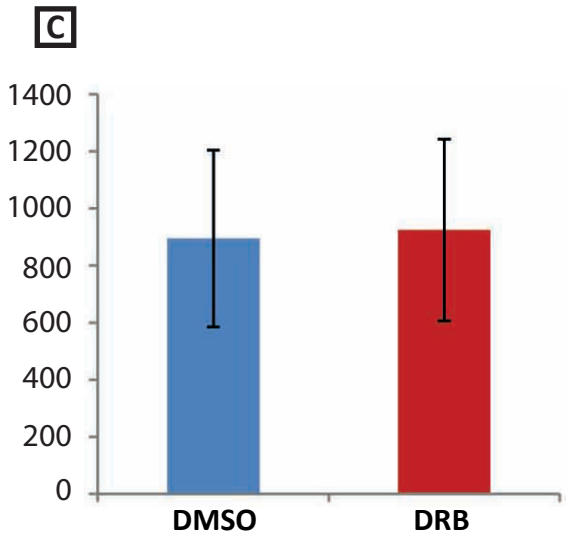

Mean number of NucView positive cells per area (cell per mm<sup>2</sup>)

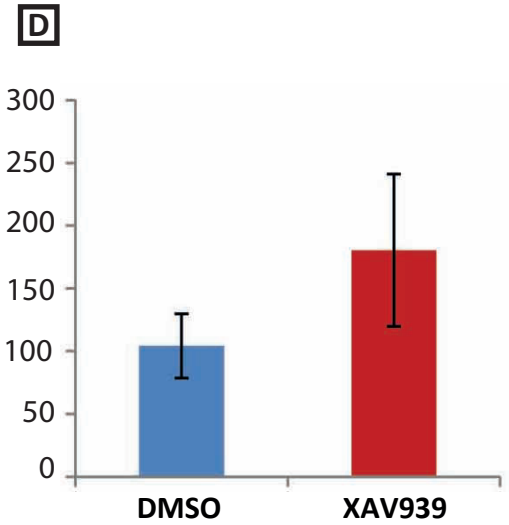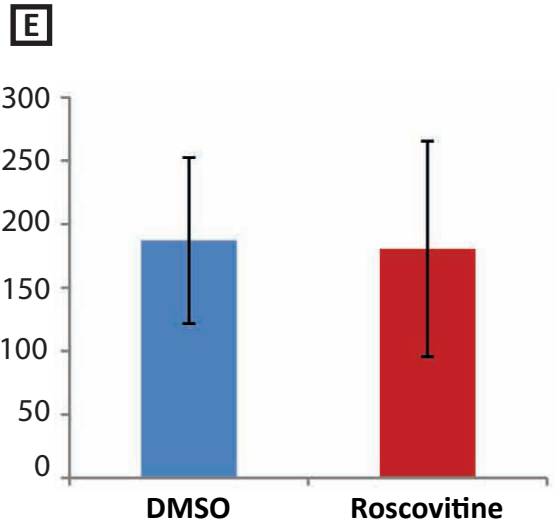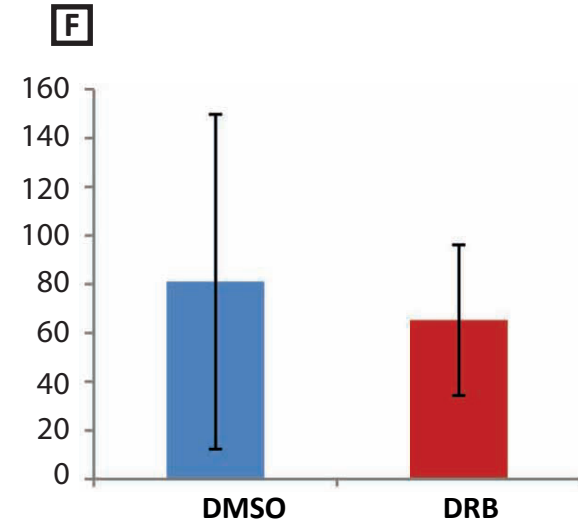

Supplement: supp [file elife-05842-supp-v1.zip › elife_poa_e05842_Figure_2_figure_supplement_2.pdf]
