# Supplementary figures and images for: A balance of positive and negative regulators determines the pace of the segmentation clock
Source: eLife journal article supplement (doi:10.7554/elife.05842), 2015-09-10

Figure 8 Figure supplement 1

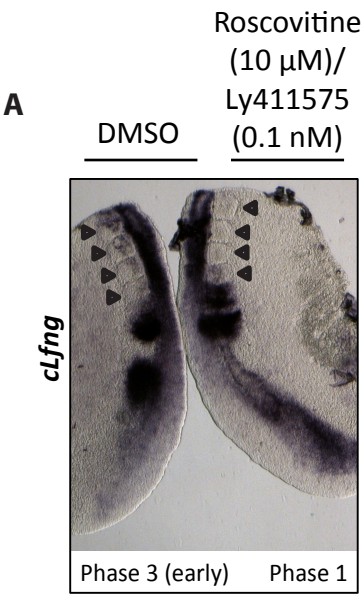

Supplement: supp [file elife-05842-supp-v1.zip › elife_poa_e05842_Figure_8_figure_supplement_1.pdf]

Figure 6 Figure Supplement 1

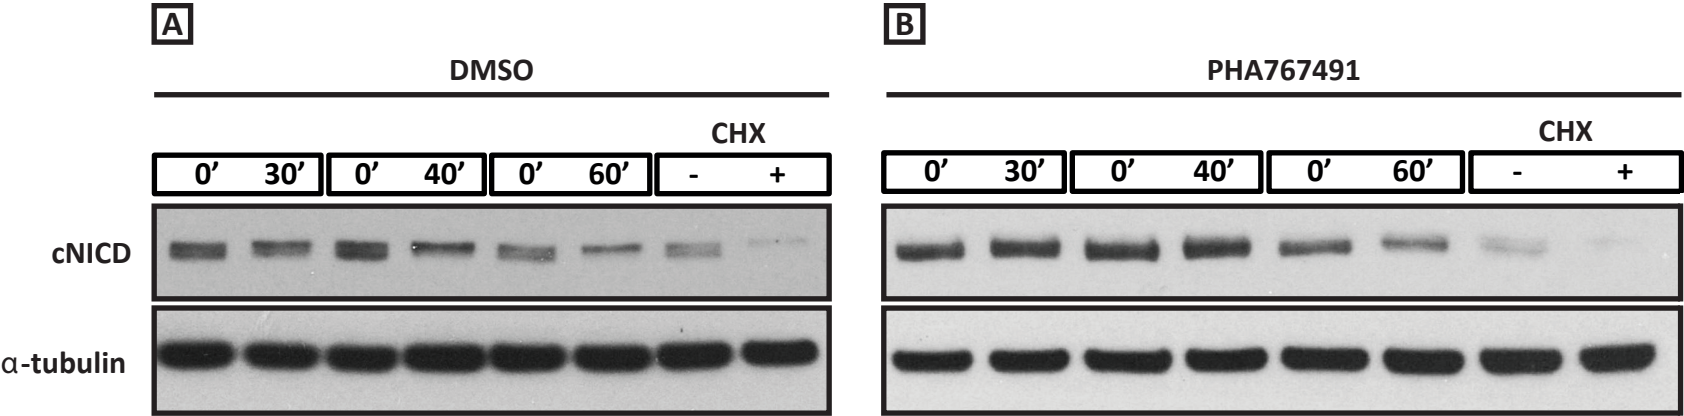

Supplement: supp [file elife-05842-supp-v1.zip › elife_poa_e05842_Figure_6_figure_supplement_1.pdf]

Figure 4 Figure supplement 1)

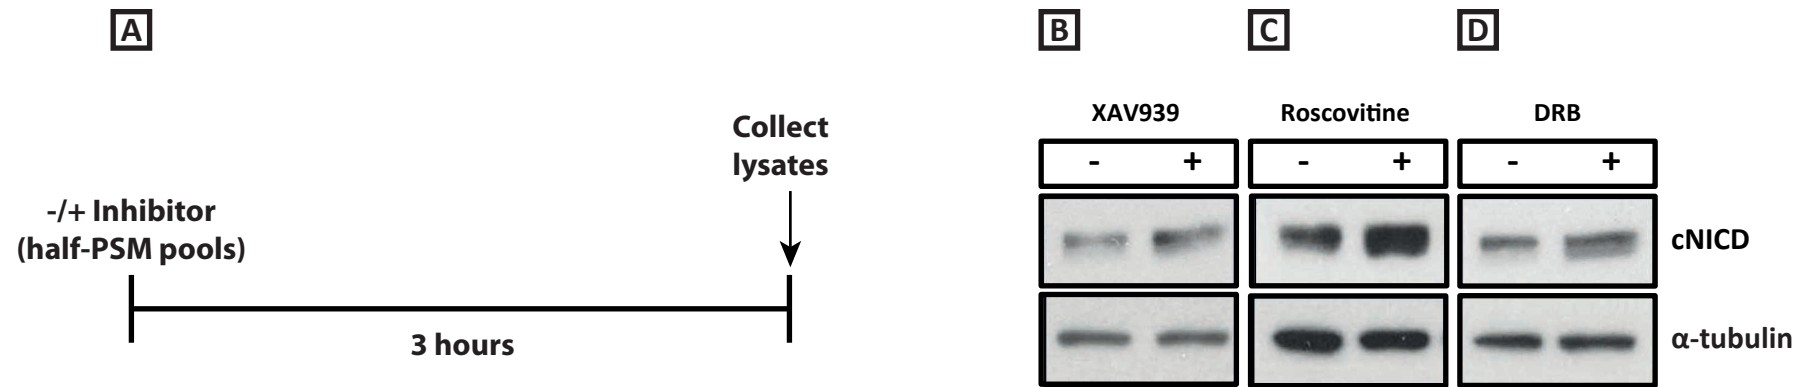

Supplement: supp [file elife-05842-supp-v1.zip › elife_poa_e05842_Figure_4_figure_supplement_1.pdf]

Figure 2 Figure supplement 3)

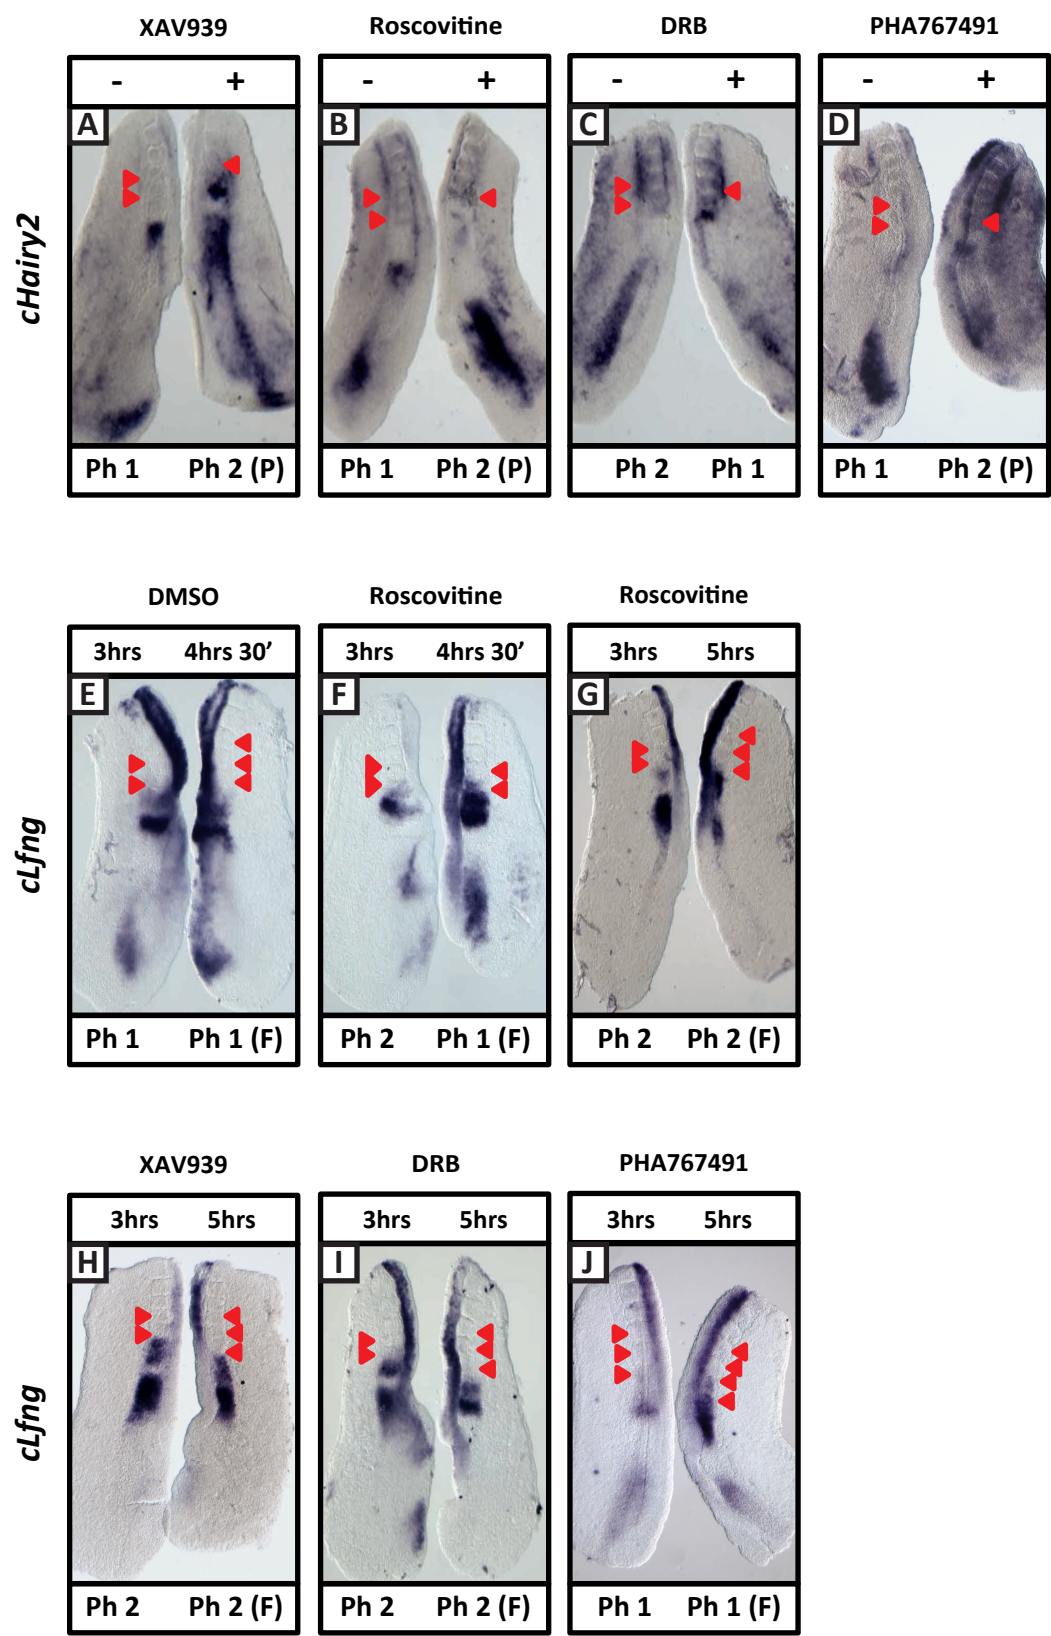

Supplement: supp [file elife-05842-supp-v1.zip › elife_poa_e05842_Figure_2_figure_supplement_3.pdf]

Figure 2 Figure supplement 1)

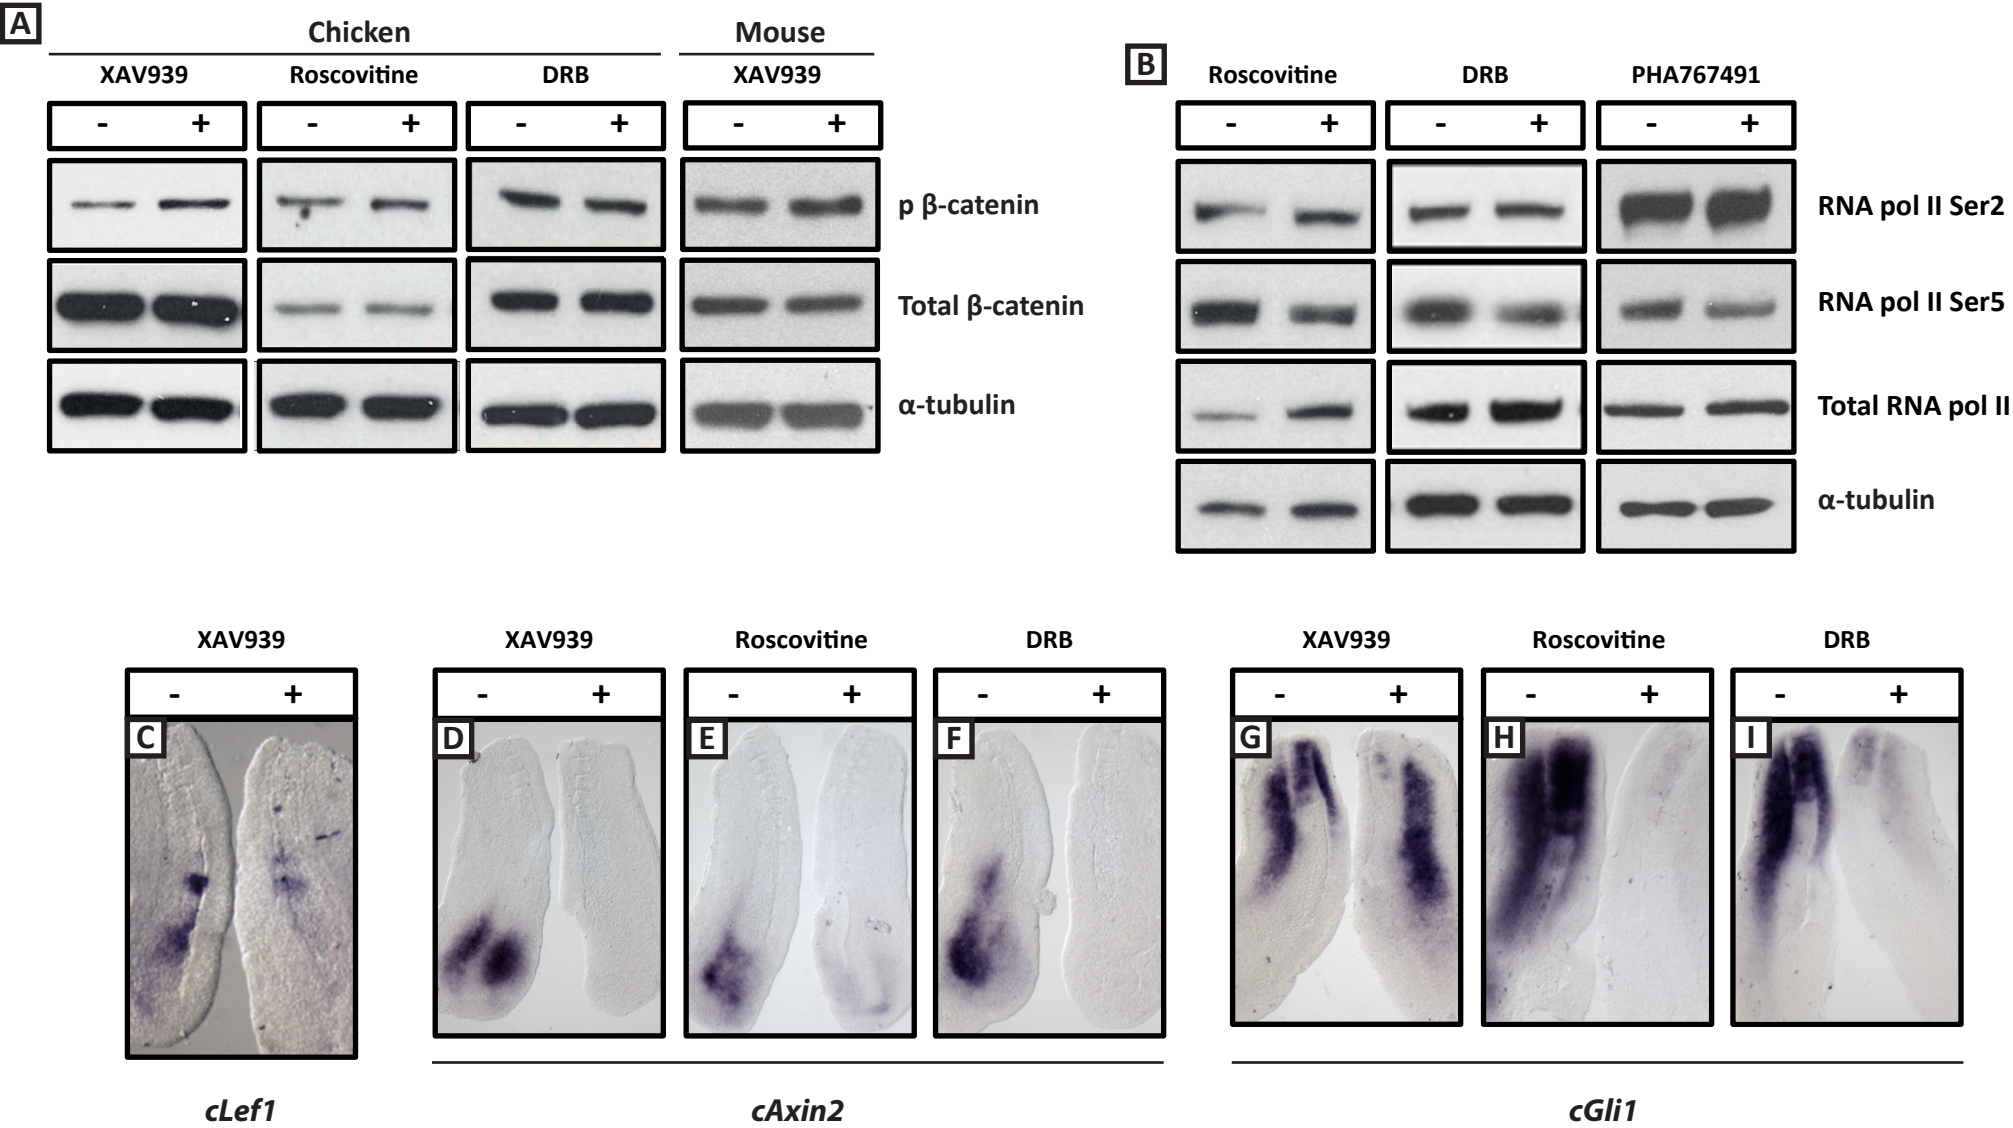

Supplement: supp [file elife-05842-supp-v1.zip › elife_poa_e05842_Figure_2_figure_supplement_1.pdf]
